# Supplementary material for: Fetal—Not Maternal—APOL1 Genotype Associated with Risk for Preeclampsia in Those with African Ancestry
Source: PubMed Central journal article supplement — Am J Hum Genet. 2018 Aug 30;103(3):367–76. doi: 10.1016/j.ajhg.2018.08.002 (PMC6128247; doi:10.1016/j.ajhg.2018.08.002), 2018-08-30
Supplement: mmc1.pdf [file mmc1.pdf]

**Supplemental Data**

**Fetal—Not Maternal—*APOL1* Genotype Associated with  
Risk for Preeclampsia in Those with African Ancestry**

**Kimberly J. Reidy, Rebecca C. Hjorten, Claire L. Simpson, Avi Z. Rosenberg, Stacy D. Rosenblum, Csaba P. Kovesdy, Frances A. Tylavsky, Joseph Myrie, Bianca L. Ruiz, Soulin Haque, Khyobeni Mozhui, George W. Nelson, Victor A. David, Xiaoping Yang, Masako Suzuki, Jack Jacob, Sandra E. Reznik, Frederick J. Kaskel, Jeffrey B. Kopp, Cheryl A. Winkler, and Robert L. Davis**

**Supplementary Data:**

| <b>Table S1: Descriptive Data of Mothers in the UTHSC Case-Control Study by Maternal <i>APOL1</i> Genotype.<sup>a</sup></b>                                                                                                                                           |                          |                                      |                                      |
|-----------------------------------------------------------------------------------------------------------------------------------------------------------------------------------------------------------------------------------------------------------------------|--------------------------|--------------------------------------|--------------------------------------|
| <b>Maternal <i>APOL1</i> Genotype</b>                                                                                                                                                                                                                                 | <b>All<br/>(n = 921)</b> | <b><i>APOL1</i> LR<br/>(n = 821)</b> | <b><i>APOL1</i> LR<br/>(n = 100)</b> |
| <b>Maternal age (years, at time of delivery)</b>                                                                                                                                                                                                                      |                          |                                      |                                      |
| 15-19                                                                                                                                                                                                                                                                 | 151 (16%)                | 134 (16%)                            | 17 (17%)                             |
| 20-24                                                                                                                                                                                                                                                                 | 346 (38%)                | 310 (38%)                            | 36 (36%)                             |
| 25-29                                                                                                                                                                                                                                                                 | 246 (27%)                | 223 (27%)                            | 23 (23%)                             |
| 30-34                                                                                                                                                                                                                                                                 | 133 (14%)                | 114 (14%)                            | 19 (19%)                             |
| ≥ 35                                                                                                                                                                                                                                                                  | 45 (5%)                  | 40 (5%)                              | 5 (5%)                               |
| <b>Household income</b>                                                                                                                                                                                                                                               |                          |                                      |                                      |
| \$0-\$24,999                                                                                                                                                                                                                                                          | 493 (54%)                | 436 (53%)                            | 57 (57%)                             |
| \$25,000-\$44,999                                                                                                                                                                                                                                                     | 164 (18%)                | 145 (18%)                            | 19 (19%)                             |
| \$45,000-\$74,999                                                                                                                                                                                                                                                     | 107 (12%)                | 94 (11%)                             | 13 (13%)                             |
| \$75,000 or over                                                                                                                                                                                                                                                      | 50 (5%)                  | 46 (6%)                              | 4 (4%)                               |
| Unknown                                                                                                                                                                                                                                                               | 107 (12%)                | 100 (12%)                            | 7 (7%)                               |
| <b>Smoking</b>                                                                                                                                                                                                                                                        |                          |                                      |                                      |
| Yes                                                                                                                                                                                                                                                                   | 78 (9%)                  | 67 (8%)                              | 11 (11%)                             |
| No                                                                                                                                                                                                                                                                    | 842 (91%)                | 753 (92%)                            | 89 (89%)                             |
| Unknown                                                                                                                                                                                                                                                               | 1(0%)                    | 1 (0%)                               | 0 (0%)                               |
| a. RA refers to <i>APOL1</i> risk allele, either G1 (S342G mutation) or G2 (a 6 bp deletion N388del;Y389del). The HR genotype consists of 2 RA. The LR genotype consists of 0 or 1 RA. Results reported as number of patients and percent of patients in parenthesis. |                          |                                      |                                      |

| <b>Maternal or Fetal</b>                                                                                                                                                                                                                                              | <b>Maternal Genotype</b> |                              |                              | <b>Fetal Genotype</b>  |                              |                              |
|-----------------------------------------------------------------------------------------------------------------------------------------------------------------------------------------------------------------------------------------------------------------------|--------------------------|------------------------------|------------------------------|------------------------|------------------------------|------------------------------|
| <b>APOL1 Genotype</b>                                                                                                                                                                                                                                                 | <b>All</b><br>(n = 921)  | <b>APOL1 LR</b><br>(n = 821) | <b>APOL1 HR</b><br>(n = 100) | <b>All</b><br>n = 747) | <b>APOL1 LR</b><br>(n = 644) | <b>APOL1 HR</b><br>(n = 103) |
| <b>Pregnancy Weight Gain</b>                                                                                                                                                                                                                                          |                          |                              |                              |                        |                              |                              |
| 0-18 kg                                                                                                                                                                                                                                                               | 592 (64%)                | 526 (64%)                    | 66 (66%)                     | 494 (66%)              | 437 (68%)                    | 57 (55%)                     |
| 18.1-36.7 kg                                                                                                                                                                                                                                                          | 199 (22%)                | 178 (22%)                    | 21 (21%)                     | 178 (24%)              | 152 (24%)                    | 26 (25%)                     |
| 36.8-55 kg                                                                                                                                                                                                                                                            | 5 (5%)                   | 4 (0%)                       | 1 (1%)                       | 3 (0%)                 | 2 (0%)                       | 1 (1%)                       |
| Unknown or weight loss                                                                                                                                                                                                                                                | 125 (14%)                | 113 (14%)                    | 12 (12%)                     | 72 (10%)               | 53 (8%)                      | 19 (18%)                     |
| <b>Gestational age</b>                                                                                                                                                                                                                                                |                          |                              |                              |                        |                              |                              |
| <36 weeks                                                                                                                                                                                                                                                             | 81 (9%)                  | 75 (9%)                      | 6 (6%)                       | 63 (8%)                | 55 (9%)                      | 8 (8%)                       |
| 37-38 weeks                                                                                                                                                                                                                                                           | 115 (12%)                | 103 (13%)                    | 12 (12%)                     | 97 (13%)               | 86 (13%)                     | 11 (11%)                     |
| 38-41 weeks                                                                                                                                                                                                                                                           | 698 (76%)                | 620 (76%)                    | 78 (78%)                     | 582 (78%)              | 499 (77%)                    | 83 (81%)                     |
| > 42 weeks                                                                                                                                                                                                                                                            | 0 (0%)                   | 0 (0%)                       | 0 (0%)                       | 0 (0%)                 | 0 (0%)                       | 0 (0%)                       |
| Unknown                                                                                                                                                                                                                                                               | 27 (3%)                  | 23 (3%)                      | 4 (4%)                       | 5 (1%)                 | 4 (1%)                       | 1 (1%)                       |
| <b>Birth weight</b>                                                                                                                                                                                                                                                   |                          |                              |                              |                        |                              |                              |
| <1500 g                                                                                                                                                                                                                                                               | 15 (2%)                  | 15 (2%)                      | 0 (0%)                       | 9 (1%)                 | 9 (1%)                       | 0 (0%)                       |
| 1501-2500 g                                                                                                                                                                                                                                                           | 68 (7%)                  | 62 (8%)                      | 6 (6%)                       | 59 (8%)                | 48 (7%)                      | 11 (11%)                     |
| 2501-4000 g                                                                                                                                                                                                                                                           | 768 (83%)                | 683 (83%)                    | 85 (85%)                     | 638 (85%)              | 553 (86%)                    | 85 (82%)                     |
| > 4000 g                                                                                                                                                                                                                                                              | 40 (4%)                  | 35 (4%)                      | 5 (5%)                       | 35 (5%)                | 29 (5%)                      | 6 (6%)                       |
| Unknown                                                                                                                                                                                                                                                               | 30 (3%)                  | 26 (3%)                      | 4 (4%)                       | 6 (1%)                 | 5 (1%)                       | 1 (1%)                       |
| <b>Delivery Type</b>                                                                                                                                                                                                                                                  |                          |                              |                              |                        |                              |                              |
| Vaginal                                                                                                                                                                                                                                                               | 562 (61%)                | 503 (61%)                    | 59 (59%)                     | 463 (62%)              | 406 (63%)                    | 57 (55%)                     |
| Cesarean section                                                                                                                                                                                                                                                      | 332 (36%)                | 295 (36%)                    | 37 (37%)                     | 279 (37%)              | 234 (36%)                    | 45 (44%)                     |
| Unknown                                                                                                                                                                                                                                                               | 27 (3%)                  | 23 (3%)                      | 4 (4%)                       | 5 (1%)                 | 4 (1%)                       | 1 (1%)                       |
| <b>Pre-eclampsia</b>                                                                                                                                                                                                                                                  |                          |                              |                              |                        |                              |                              |
| Yes                                                                                                                                                                                                                                                                   | 93 (10%)                 | 87 (11%)                     | 6 (6%)                       | 73 (10%)               | 57 (9%)                      | 16 (16%)                     |
| No                                                                                                                                                                                                                                                                    | 793 (86%)                | 703 (86%)                    | 90 (90%)                     | 666 (89%)              | 581 (90%)                    | 85 (83%)                     |
| Unknown                                                                                                                                                                                                                                                               | 35 (4%)                  | 31 (4%)                      | 4 (4%)                       | 8 (1%)                 | 6 (1%)                       | 2 (2%)                       |
| <b>Placental Abruption</b>                                                                                                                                                                                                                                            |                          |                              |                              |                        |                              |                              |
| Yes                                                                                                                                                                                                                                                                   | 5 (1%)                   | 5 (1%)                       | 0 (0%)                       | 3 (0%)                 | 1 (0%)                       | 2 (2%)                       |
| No                                                                                                                                                                                                                                                                    | 327 (36%)                | 290 (35%)                    | 37 (37%)                     | 276 (37%)              | 233 (36%)                    | 43 (42%)                     |
| Missing                                                                                                                                                                                                                                                               | 589 (64%)                | 526 (64%)                    | 63 (63%)                     | 468 (63%)              | 410 (64%)                    | 58 (56%)                     |
| <p>a. RA refers to APOL1 risk allele, either G1 (S342G mutation) or G2 (a 6 bp deletion N388del;Y389del). The HR genotype consists of 2 RA. The LR genotype consists of 0 or 1 RA. Results reported as number of patients and percent of patients in parenthesis.</p> |                          |                              |                              |                        |                              |                              |

**Table S3. Characteristics of Preeclamptic Births in EMC Case Only Study Population, by Maternal *APOL1* Genotype.**<sup>a</sup>

| <i>APOL1</i> Genotype                         | All<br>(n = 24) | <i>APOL1</i> LR<br>(n = 22) | <i>APOL1</i> HR<br>(n = 22) |
|-----------------------------------------------|-----------------|-----------------------------|-----------------------------|
| <b>Maternal Risk Factors for Preeclampsia</b> |                 |                             |                             |
| Maternal Age – y (IQR)                        | 32 (9.5)        | 32 (9.75)                   | 33 (4)                      |
| Nulliparity - n (%)                           | 5 (21%)         | 5 (23%)                     | 0 (0%)                      |
| Obesity - n (%)                               | 6 (25%)         | 6 (27%)                     | 0 (0%)                      |
| History of Hypertension - n (%)               | 6 (25%)         | 6 (27%)                     | 0 (0%)                      |
| History of Diabetes - n (%)                   | 0 (0%)          | 0 (0%)                      | 0 (0%)                      |
| History of Prior Preeclampsia - n (%)         | 3 (13%)         | 2 (9%)                      | 1 (50%)                     |
| History of Spontaneous Abortion - n (%)       | 4 (17%)         | 4 (18%)                     | 0 (0%)                      |
| <b>Perinatal Outcomes</b>                     |                 |                             |                             |
| Cesarean Delivery - n (%)                     | 14 (58%)        | 12 (55%)                    | 2 (100%)                    |
| Gestational Age - weeks (IQR)                 | 36.4 (7.3)      | 36.8 (6.5)                  | 32.3 (2.7)                  |
| Birth Weight - g (IQR)                        | 2,333 (1,311)   | 2,333 (1,104)               | 2,058 (938)                 |
| Apgar Score, 1 min (IQR)                      | 8 (4.3)         | 8 (4.0)                     | 8.5 (0.5)                   |
| Apgar Score ± 5 min (IQR)                     | 9 (1.0)         | 9 (1.0)                     | 8.5 (0.5)                   |

a. RA refers to *APOL1* risk allele, either G1 (S342G mutation) or G2 (a 6 bp deletion N388del;Y389del). The HR genotype consists of 2 RA. The LR genotype consists of 0 or 1 RA. Continuous variables are reported as median and interquartile range in parenthesis.

**Table S4. Presence of Pathology Changes Consistent with Preeclampsia in EMC Case Only Study Population, by Fetal *APOL1* Genotype.<sup>a</sup>**

| <b>Fetal <i>APOL1</i> Genotype</b>             | <b>All<br/>(n = 36)</b> | <b><i>APOL1</i> LR<br/>(n = 19)</b> | <b><i>APOL1</i> HR<br/>(n = 17)</b> |
|------------------------------------------------|-------------------------|-------------------------------------|-------------------------------------|
| <b>Overall Decidual Vasculopathy</b>           |                         |                                     |                                     |
| <i>Mild</i>                                    | 6 (17%)                 | 3 (16%)                             | 3 (18%)                             |
| <i>Moderate</i>                                | 15 (42%)                | 7 (37%)                             | 8 (47%)                             |
| <i>Severe</i>                                  | 11 (31%)                | 8 (42%)                             | 3 (18%)                             |
| <b>Presence of Decidual Vasculopathy</b>       |                         |                                     |                                     |
| <i>Fetal Membranes</i>                         | 25 (69%)                | 12 (63%)                            | 13 (76%)                            |
| <i>Basal plate</i>                             | 23 (64%)                | 12 (63%)                            | 11 (65%)                            |
| <b>Other Histopathological Findings</b>        |                         |                                     |                                     |
| Thrombosis                                     | 9 (25%)                 | 6 (32%)                             | 3 (18%)                             |
| Hypertrophic Changes                           | 28 (78%)                | 14 (74%)                            | 14 (82%)                            |
| Atherosclerosis                                | 17 (47%)                | 10 (53%)                            | 7 (41%)                             |
| Fibrinoid Necrosis                             | 13 (36%)                | 8 (42%)                             | 5 (29%)                             |
| Retroplacental Hemorrhage/Hematoma             | 4 (11%)                 | 3 (16%)                             | 1 (6%)                              |
| Chronic Villitis                               | 3 (8%)                  | 1 (5%)                              | 2 (12%)                             |
| Infarct                                        | 6 (17%)                 | 4 (21%)                             | 2 (12%)                             |
| Intervillous Thrombus                          | 9 (25%)                 | 3 (16%)                             | 6 (35%)                             |
| Distal Villous Hypoplasia                      | 22 (61%)                | 14 (74%)                            | 8 (47%)                             |
| Intervillous fibrin                            | 3 (8%)                  | 1 (5%)                              | 2 (12%)                             |
| Increase in Syncytial Knots / Rapid Maturation | 22 (61%)                | 14 (74%)                            | 8 (47%)                             |
| Villous Edema/Dysmaturity                      | 1 (3%)                  | 0 (0%)                              | 1 (6%)                              |

a. RA refers to *APOL1* risk allele, either G1 (S342G mutation) or G2 (a 6 bp deletion N388del;Y389del). The HR genotype consists of 2 RA. The LR genotype consists of 0 or 1 RA. Results reported as number of patients and percent of patients in parenthesis.

**Table S5. Characteristics of Severe Preeclampsia in EMC Case Only Study Population, by Fetal *APOL1* Risk Genotype.<sup>a</sup>**

| <b>APOL Genotype</b>                    | <b>All</b><br>(n = 121) | <b><i>APOL1</i></b><br><b>LR</b><br>(n = 98) | <b><i>APOL1</i></b><br><b>HR</b><br>(n = 24) | <b>p-value</b>          |
|-----------------------------------------|-------------------------|----------------------------------------------|----------------------------------------------|-------------------------|
| Presence of Severe Preeclampsia - n (%) | 119 (98%)               | 95 (98%)                                     | 24 (100%)                                    | 1.00                    |
| Blood pressure $\geq$ 160/110 - n (%)   | 111 (92%)               | 87 (90%)                                     | 24 (100%)                                    | 0.21                    |
| Thrombocytopenia - n (%)                | 15 (12%)                | 11 (11%)                                     | 4 (17%)                                      | 0.49                    |
| Renal Insufficiency - n (%)             | 28 (23%)                | 22 (23%)                                     | 6 (25%)                                      | 0.79                    |
| Impaired Liver function - n (%)         | 29 (24%)                | 22 (23%)                                     | 7 (29%)                                      | 0.59                    |
| Pulmonary Edema - n (%)                 | 5 (4%)                  | 5 (5%)                                       | 0 (0%)                                       | 0.58                    |
| Cerebral or Visual Dysfunction - n (%)  | 51 (42%)                | 36 (37%)                                     | 15 (63%)                                     | <b>0.04<sup>b</sup></b> |
| HELLP Syndrome - n (%)                  | 12 (10%)                | 8 (8%)                                       | 4 (17%)                                      | 0.25                    |

a. RA refers to *APOL1* risk allele, either G1 (S342G mutation) or G2 (a 6 bp deletion N388del;Y389del). The HR genotype consists of 2 RA. The LR genotype consists of 0 or 1 RA. Those with the high-risk genotype were compared to those with the low-risk genotype with significance testing via a two-tailed Fisher's exact test.

b. p-value  $\leq$  0.05

**Table S6. Characteristics of Severe Preeclampsia in EMC Case Only Study Population, by Maternal *APOL1* Risk Genotype.<sup>a</sup>**

| <b>APOL Genotype</b>                   | <b>All</b> | <b><i>APOL1</i> LR</b> | <b><i>APOL1</i> HR</b> |
|----------------------------------------|------------|------------------------|------------------------|
|                                        | (n = 24)   | (n = 22)               | (n = 2)                |
| Presence of Severe Preeclampsia (n, %) | 22 (92%)   | 20 (91%)               | 2 (100%)               |
| Blood pressure $\geq$ 160/110 (n, %)   | 20 (83%)   | 18 (82%)               | 2 (100%)               |
| Thrombocytopenia (n, %)                | 4 (17%)    | 3 (14%)                | 1 (50%)                |
| Renal Insufficiency (n, %)             | 5 (21%)    | 4 (18%)                | 1 (50%)                |
| Impaired Liver function (n, %)         | 5 (21%)    | 4 (18%)                | 1 (50%)                |
| Pulmonary Edema (n, %)                 | 0 (0%)     | 0 (0%)                 | 0 (0%)                 |
| Cerebral or Visual Dysfunction (n, %)  | 5 (21%)    | 4 (18%)                | 1 (50%)                |
| HELLP Syndrome (n, %)                  | 3 (13%)    | 2 (9%)                 | 1 (50%)                |

a. RA refers to *APOL1* risk allele, either G1 (S342G mutation) or G2 (a 6 bp deletion N388del;Y389del). The HR genotype consists of 2 RA. The LR genotype consists of 0 or 1 RA. Reported as number of patients and percent of patients in parenthesis.

**Table S7. APOL1 Genotype Distributions in both the EMC Case Only and UTHSC Case Control Populations.<sup>a</sup>**

| Gene                            | Variant | Genotype (n(%)) |          |          | Total (n) | HWE p-value          |
|---------------------------------|---------|-----------------|----------|----------|-----------|----------------------|
|                                 |         | wt/wt           | wt/m     | m/m      |           |                      |
| <i>EMC Fetal Genotypes</i>      | G1      | 64 (53%)        | 50 (41%) | 7 (5.8%) | 121       | p = 0.64             |
|                                 | G2      | 91 (75%)        | 21 (17%) | 9 (7.4%) | 121       | <b>p &lt; 0.0001</b> |
| <i>EMC Maternal Genotypes</i>   | G1      | 16 (67%)        | 8 (33%)  | 0 (0%)   | 24        | p = 1.00             |
|                                 | G2      | 19 (79%)        | 3 (13%)  | 2 (8.3%) | 24        | <b>p = 0.05</b>      |
| <i>UTHSC Fetal Genotypes</i>    | G1      | 50(63%)         | 24(30%)  | 6(8%)    | 80        | p=0.21               |
|                                 | G2      | 50(68%)         | 19(26%)  | 5(7%)    | 74        | p=0.13               |
| <i>UTHSC Maternal Genotypes</i> | G1      | 57(61%)         | 35(38%)  | 1(1%)    | 93        | p<0.11               |
|                                 | G2      | 71(76%)         | 20(22%)  | 2(2%)    | 93        | P=0.64               |

a. *APOL1* G1 allele comprises two missense variants rs73885319 (G1g) and rs60910145 (G1m); however, the presence of only the G1g variant is sufficient to define the G1 risk allele. *APOL1* G2 allele consists of a 6 base-pair (bp) in-frame deletion, rs717185313. Deviation from Hardy Weinberg Equilibrium calculated using an exact test with selome p-value.



**Table S8. Independent Effects of the Fetal *APOL1* G1 and G2 Risk Alleles on the Risk for Preeclampsia in the UTHSC Case Control Study Population**

| Risk Allele | Stratum | Number Case/Control<br>n/n | 1 vs 0 Risk Allele |         | 2 vs. 0 Risk Alleles |         | 2 vs. 1 Risk Alleles |         |
|-------------|---------|----------------------------|--------------------|---------|----------------------|---------|----------------------|---------|
|             |         |                            | OR (CI)            | p-value | OR (CI)              | p-value | OR (CI)              | p-value |
| G1          | No G2   | 583                        | 0.74 (0.36, 1.46)  | 0.42    | 1.38 (0.39, 3.92)    | 0.57    | 1.87 (0.50, 5.84)    | 0.33    |
| G2          | No G1   | 464                        | 1.42 (0.65, 2.96)  | 0.35    | 2.82 (0.64, 9.81)    | 0.09    | 1.99 (0.41, 7.74)    | 0.28    |
| G1/G2       | G1/G2   | 677                        | NA                 | NA      | 1.80 (0.57, 4.87)    | 0.25    | NA                   | NA      |
| G1 or G2    | All     | 802                        | 0.95 (0.53, 1.70)  | 0.89    | 1.79 (0.85, 3.65)    | 0.09*   | 1.89 (0.89, 3.86)    | 0.98    |

The *APOL1* risk alleles are as follows; G1 (S342G mutation) or G2 (a 6 bp deletion N388del;Y389del). Stratum refers to analysis that analyzed a subset of genotypes (ex. Subgroup of cases and controls that lacked the G1 allele). G1/G2 compound heterozygotes were compared to subjects lacking both G1 and G2. NA is short for not applicable

\* Of note G1 or G2, under the 2 versus 0 allele model, does not reach statistical significance because of the reduced power as compared to the recessive model of inheritance seen in Table 1 (2 versus 0 OR 1 model).

**Table S9. *APOL1* Genotype Frequencies in the EMC Study Healthy Controls.**

| Genotype | Controls Bethesda |      | Controls Southeast |      |
|----------|-------------------|------|--------------------|------|
|          | n=176             | %    | n=923              | %    |
| +/+      | 77                | 0.44 | 409                | 0.44 |
| G1/+     | 41                | 0.23 | 250                | 0.27 |
| G1/G1    | 9                 | 0.05 | 41                 | 0.04 |
| G1/G2    | 8                 | 0.05 | 50                 | 0.05 |
| G2/+     | 36                | 0.20 | 155                | 0.17 |
| G2/G2    | 5                 | 0.03 | 18                 | 0.02 |
